# Supplementary material for: Glucose determination based on a two component self-assembled monolayer functionalized surface-enhanced Raman spectroscopy (SERS) probe
Source: Royal Society of Chemistry journal article supplement (doi:10.1039/c4ay00559g), 2014-01-01
Supplement: c4ay00559g1.pdf [file c4ay00559g1.pdf]

## SUPPLEMENTAL MATERIAL

### **Glucose determination based on two component self-assembled monolayer functionalized surface-enhanced Raman spectroscopy (SERS) probe**

**Hilal Torul<sup>a</sup>, Hakan Çiftçi<sup>b</sup>, Fahriye Ceyda Dudak<sup>c</sup>, Yekbun Adıgüzel<sup>d</sup>, Haluk Kulah<sup>d,e</sup>,  
İsmail Hakkı Boyacı<sup>c</sup>, Uğur Tamer<sup>\*a</sup>**

<sup>a</sup>Gazi University, Faculty of Pharmacy, Department of Analytical Chemistry 06330, Ankara, TURKEY

<sup>b</sup>Kırıkkale University, Kırıkkale Vocational High School, Department of Chemistry and Chemical Processing Technologies, 71450 Yahşihan, Kırıkkale, TURKEY

<sup>c</sup>Department of Food Engineering, Hacettepe University, Beytepe, 06512, Ankara, TURKEY

<sup>d</sup>METU-MEMS Research and Application Center, Middle East Technical University (METU), Ankara, TURKEY

<sup>e</sup>Department of Electrical and Electronics Engineering, Middle East Technical University, Universiteler Mah., Dumlupınar Bulv. No: 1, 06800 Cankaya, Ankara, TURKEY

**\*Correspondence: Uğur Tamer, E-Mail: [utamer@gazi.edu.tr](mailto:utamer@gazi.edu.tr)**

**Gazi University, Faculty of Pharmacy, Department of Analytical Chemistry 06330, Ankara, TURKEY,**

**Fax: 903122235018**

**Tel: 903122023105**

**Figure S1**

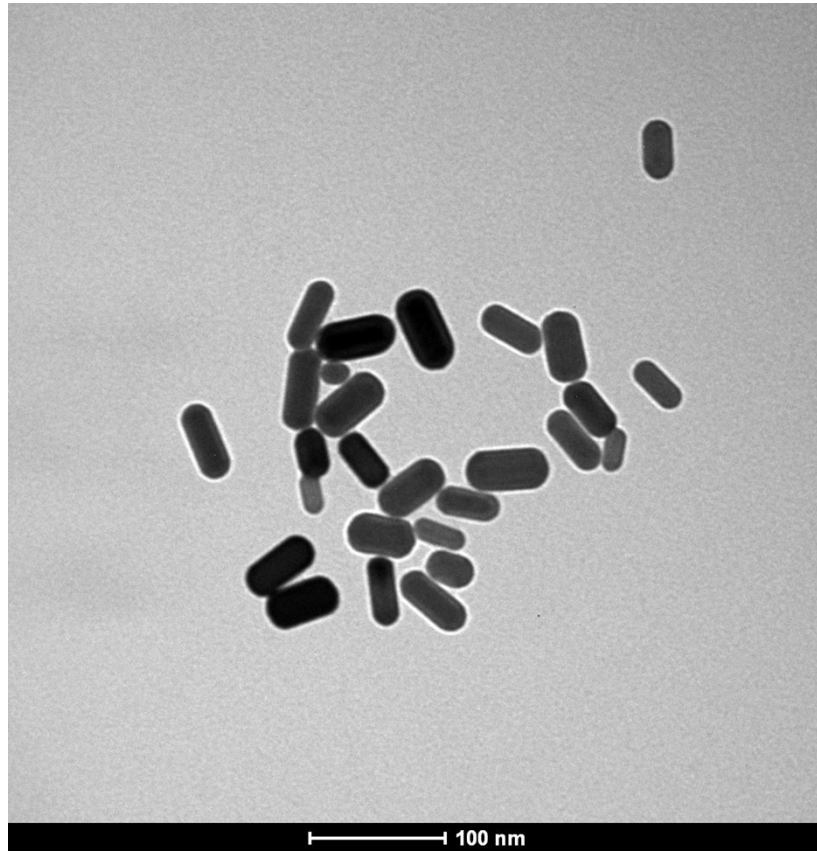

**Figure S1.** The TEM images of the rod shaped gold nanoparticles

**Figure S2**

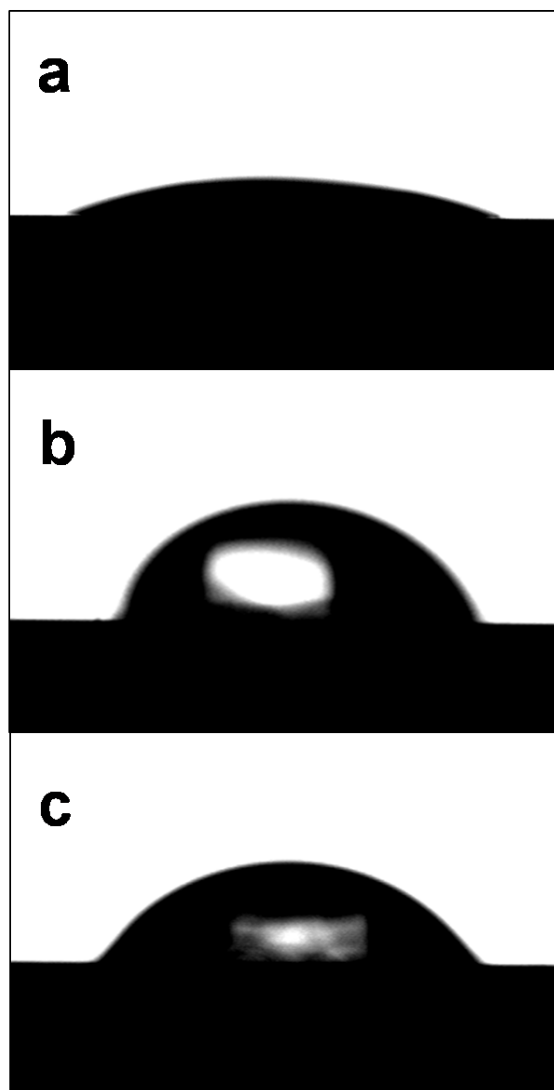

**Figure S2.** The photographs show a water drop in contact with a) Au surface, b) AuSAM and c) AuSAM–AuNPsSAM surfaces

Figure S3.

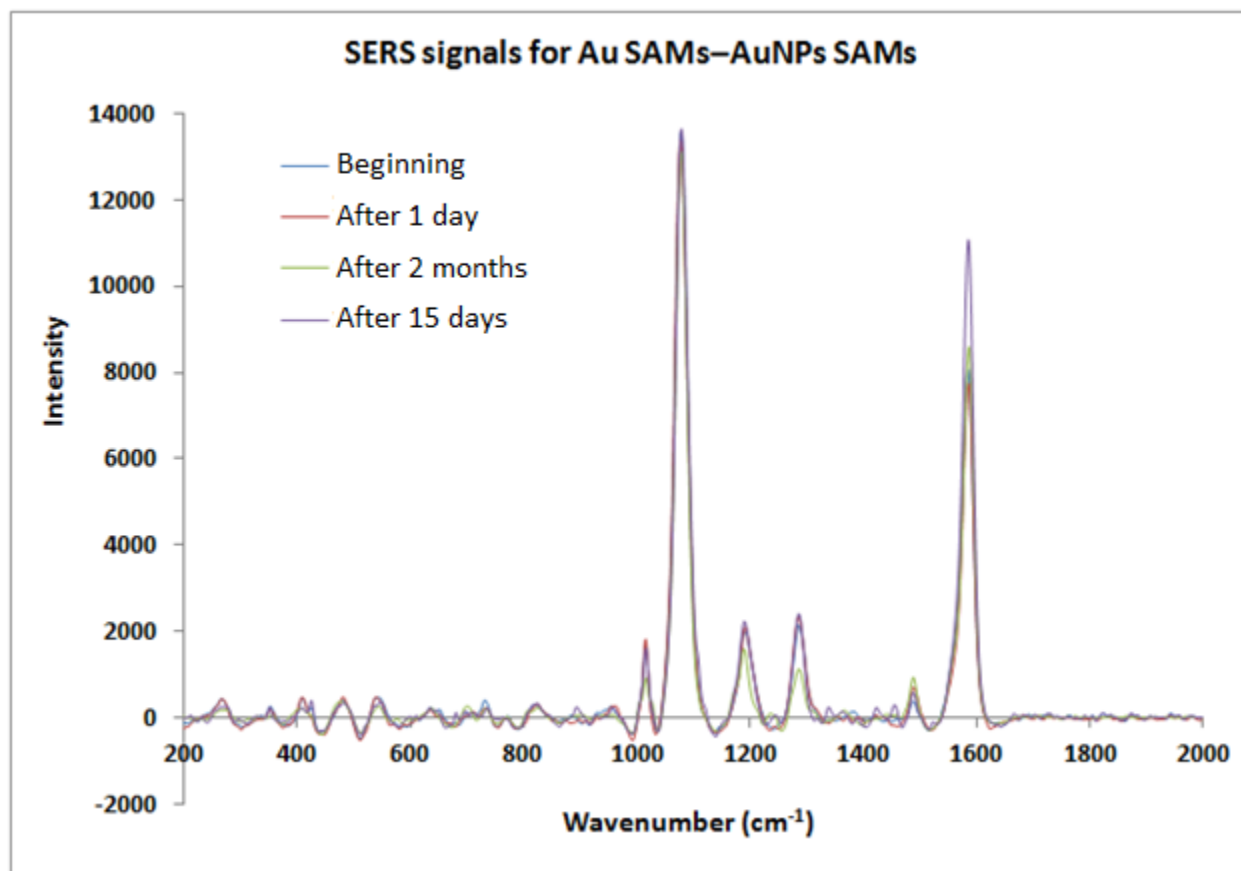

Figure S3. The results of the stability studies for the prepared SERS probe

**Figure S4**

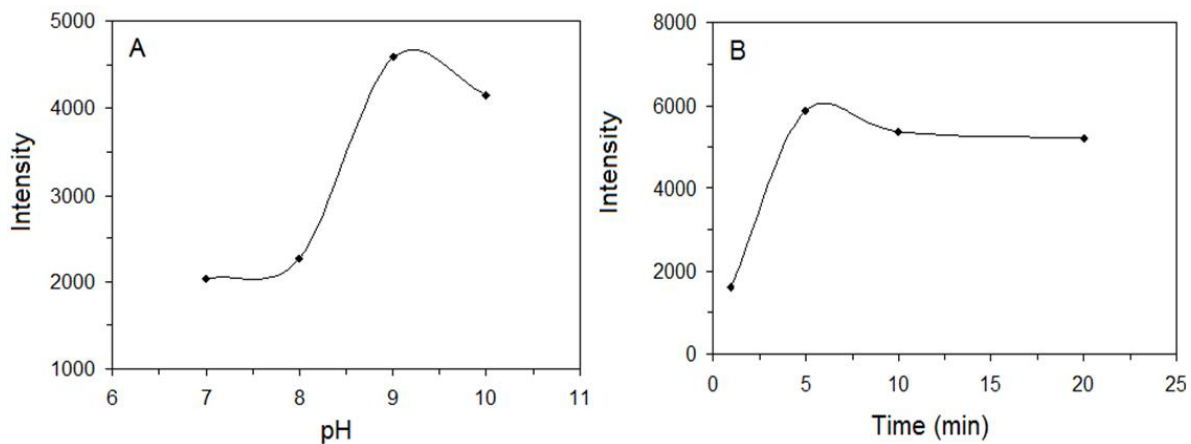

**Figure S4.** The effect of a) solution pH and b) surface-incubation time of the 4 mM glucose solution, on the change in the B-OH SERS signal at 1070 cm<sup>-1</sup>

**Figure S5**

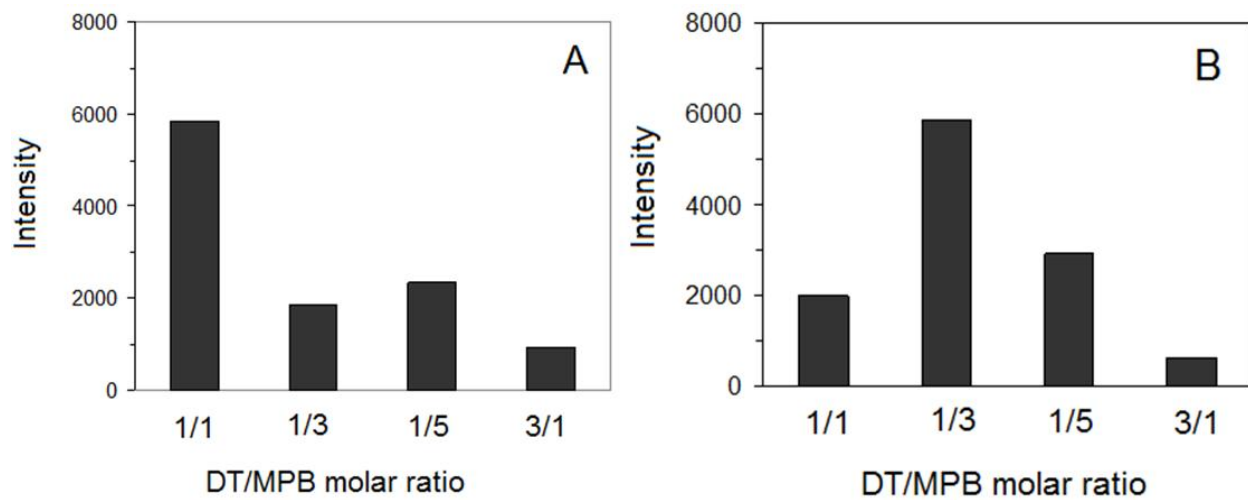

**Figure S5.** The effect of the 1-DT /3-MBA molar ratio that was used during modification of the a) gold surfaces and b) Au NPs, on the B-OH SERS signal at 1070 cm<sup>-1</sup>

**Figure S6**

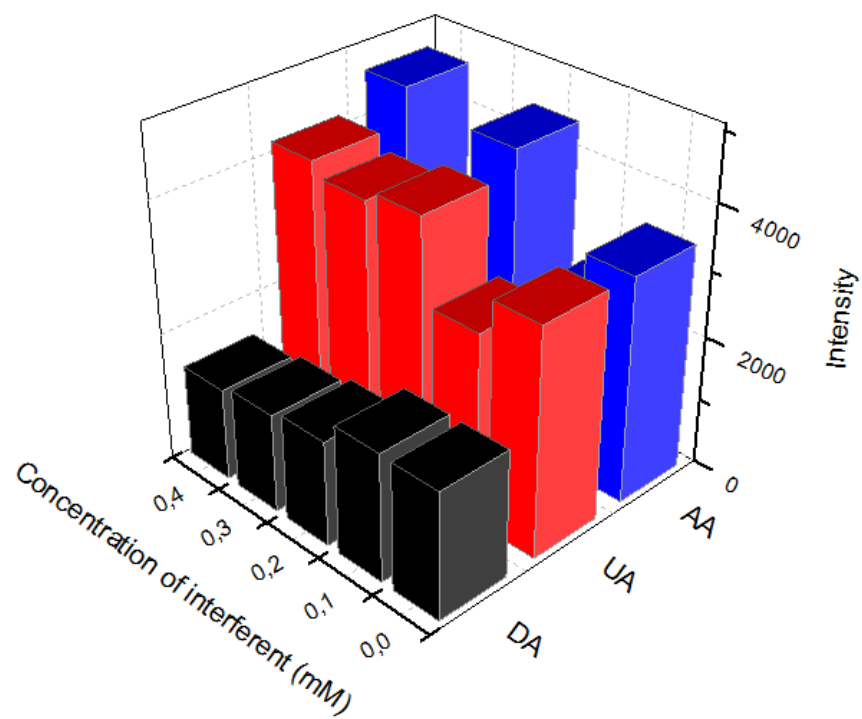

**Figure S6.** The effect of interferent ions on the determination of glucose
